# Supplementary material for: Cost Effectiveness of Dapagliflozin for Heart Failure Across the Spectrum of Ejection Fraction: An Economic Evaluation Based on Pooled, Individual Participant Data From the DELIVER and DAPA‐HF Trials
Source: PubMed Central journal article supplement — J Am Heart Assoc. 2024 Feb 23;13(5):e032279. doi: 10.1161/JAHA.123.032279 (PMC10944049; doi:10.1161/jaha.123.032279), 2024-02-23
Supplement: JAH3-13-e032279-s001.pdf [file JAH3-13-e032279-s001.pdf]

# **Supplemental Material**

**Table S1. Modeling Inputs – DELIVER Population Only.**

|                                                                      | <b>Value</b> | <b>Range</b> | <b>Source</b>                                             |
|----------------------------------------------------------------------|--------------|--------------|-----------------------------------------------------------|
| <b><u>Transition Probabilities*</u></b>                              |              |              |                                                           |
| Worsening HF events                                                  | 0.022        | 0.016-0.032  | Trial                                                     |
| Cardiovascular Mortality                                             | 0.004        | 0.003-0.006  | Trial                                                     |
| <b><u>Effectiveness of Dapagliflozin vs. Placebo</u></b>             |              |              |                                                           |
| Worsening HF events                                                  | 0.73         | 0.62-0.87    | Trial                                                     |
| Cardiovascular Mortality                                             | 0.88         | 0.74-1.05    | Trial                                                     |
| <b><u>Proportions of Events (US Population)</u></b>                  |              |              |                                                           |
| Proportion of Worsening HF Events attributable to HF Hospitalization | 0.92         | 0.87-0.95    | Trial                                                     |
| Proportion of All-Cause Mortality attributable to CV Mortality       | 0.47         | 0.36-0.57    | Trial                                                     |
| <b><u>Utilities</u></b>                                              |              |              |                                                           |
| Dapagliflozin                                                        | 0.825        | 0.821-0.829  | Isaza et. al. & prior modeling <sup>6,29,30</sup> ; Trial |
| Placebo                                                              | 0.811        | 0.806-0.815  | Isaza et. al. & prior modeling <sup>6,29,30</sup> ; Trial |

\*Transition probabilities derived from placebo event rates among US participants in DELIVER. Worsening HF events include hospitalization for HF and urgent HF visits.

“Trial” refers to participant-level data from the DELIVER trial. All other modeling parameters are consistent with those reported in Table 1.

**Table S2. Cost Effectiveness at Various Monthly Costs of Dapagliflozin using Pooled Data from DAPA-HF and DELIVER.**

|                                                                        | Mean #<br>Worsening<br>HF Events | Life-<br>years | Costs<br>(\$) | Effectiveness<br>(QALYs) | Incremental<br>Cost (\$) | Incremental<br>Effectiveness<br>(QALYs) | ICER<br>(\$/QALY) |
|------------------------------------------------------------------------|----------------------------------|----------------|---------------|--------------------------|--------------------------|-----------------------------------------|-------------------|
| <b>Medicare Part-D (\$514.95/mo)<sup>23</sup></b>                      |                                  |                |               |                          |                          |                                         |                   |
| Standard of Care                                                       | 2.38                             | 7.47           | 109,003       | 6.04                     | 45,509                   | 0.53                                    | 85,554            |
| Dapagliflozin                                                          | 1.87                             | 7.98           | 154,512       | 6.57                     |                          |                                         |                   |
| <b>Medicare Part-D w/ 49% Rebate (\$262.62/mo)<sup>^8</sup></b>        |                                  |                |               |                          |                          |                                         |                   |
| Standard of Care                                                       | 2.38                             | 7.47           | 111,561       | 6.04                     | 21,321                   | 0.53                                    | 40,081            |
| Dapagliflozin                                                          | 1.87                             | 7.98           | 130,324       | 6.57                     |                          |                                         |                   |
| <b>Wholesale Acquisition Cost (\$548.83/mo)<sup>24</sup></b>           |                                  |                |               |                          |                          |                                         |                   |
|                                                                        | 2.38                             | 7.47           | 109,003       | 6.04                     | 48,765                   | 0.53                                    | 91,675            |
|                                                                        | 1.87                             | 7.98           | 157,768       | 6.57                     |                          |                                         |                   |
| <b>Federal Supply Schedule Big Four (\$396.14/mo)<sup>25</sup></b>     |                                  |                |               |                          |                          |                                         |                   |
|                                                                        | 2.38                             | 7.47           | 109,003       | 6.04                     | 34,120                   | 0.53                                    | 64,143            |
|                                                                        | 1.87                             | 7.98           | 151,913       | 6.57                     |                          |                                         |                   |
| <b>Medicare Part-D w/ Reduced Rebate (\$314.08/mo)<sup>*8,21</sup></b> |                                  |                |               |                          |                          |                                         |                   |
|                                                                        | 2.38                             | 7.47           | 109,003       | 6.04                     | 26,257                   | 0.53                                    | 49,362            |
|                                                                        | 1.87                             | 7.98           | 135,260       | 6.57                     |                          |                                         |                   |
| <b>Canadian Estimate (\$68.25/mo)<sup>27</sup></b>                     |                                  |                |               |                          |                          |                                         |                   |
|                                                                        | 2.38                             | 7.47           | 109,003       | 6.04                     | 2,688                    | 0.53                                    | 5,053             |
|                                                                        | 1.87                             | 7.98           | 111,691       | 6.57                     |                          |                                         |                   |

Worsening HF events = hospitalization for heart failure or urgent HF visit; QALYs = quality-adjusted life years; mo = month

<sup>^</sup> Based on published estimate of 49% rebates.

<sup>\*</sup>Based on published estimates of a reduced rebate in which 20% of the rebate is retained by entities.

Note: ICERs represent ratio of incremental costs and incremental QALY without rounding.

**Figure S1. Probabilistic Sensitivity Analysis of the Addition of Dapagliflozin to Standard of Care in Chronic HF.**

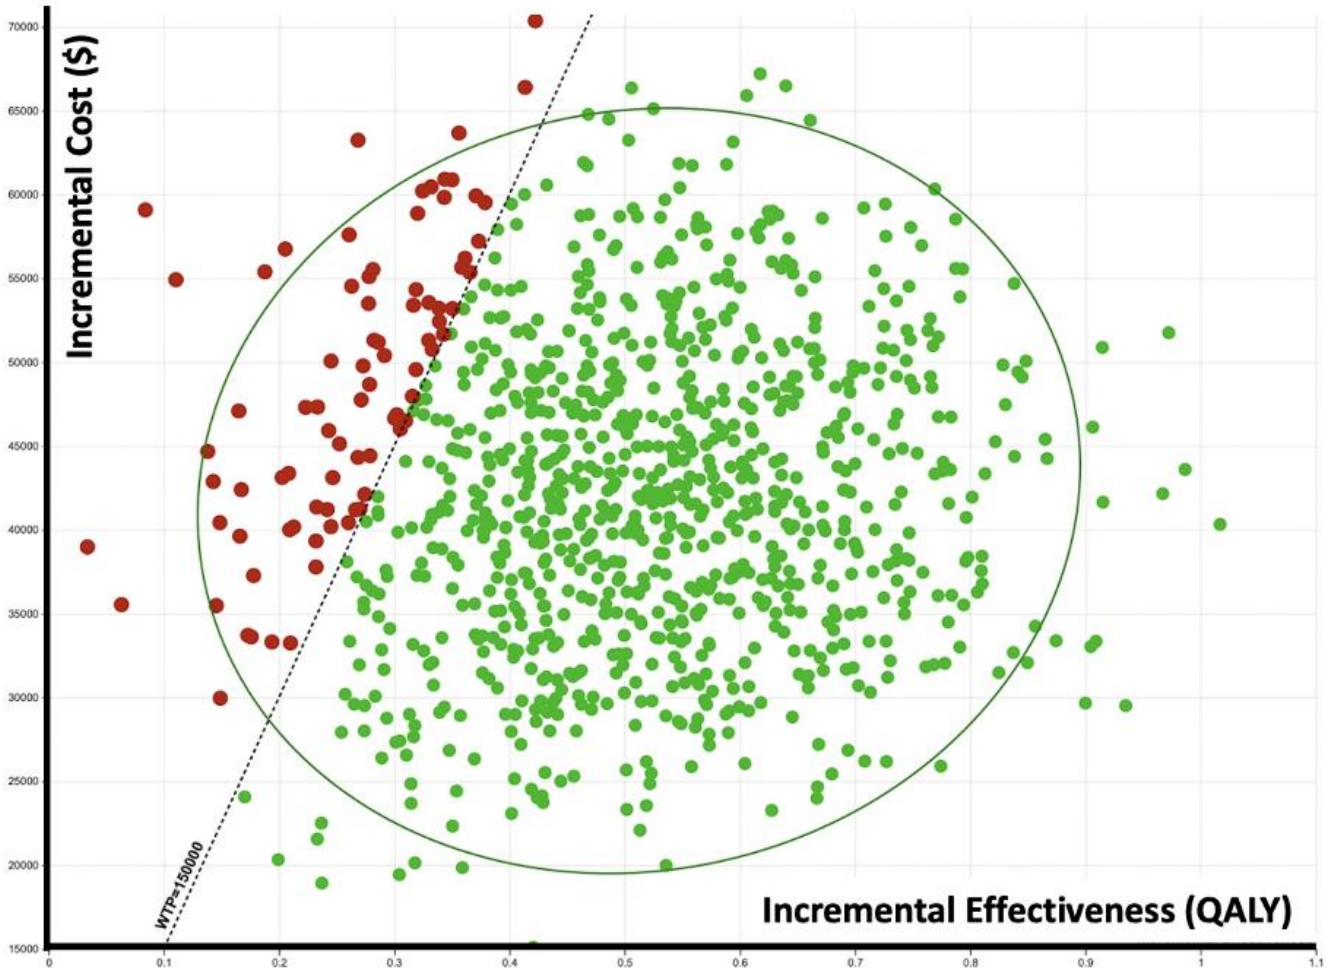

Model parameters were independently varied across their distributions in a probabilistic sensitivity analysis for 100,000 iterations using the full (undiscounted) Medicare cost, with each iteration displayed as a dot in this scatter plot. The dashed black line represents a willingness to pay threshold of \$150,000 per QALY gained. The green oval represents points falling in the 95% credible interval. Green dots represent iterations at an ICER <\$150,000 per QALY gained; red dots represent iterations at an ICER  $\geq$ \$150,000 per QALY gained.

WTP = willingness-to-pay

**Figure S2. Probabilistic Sensitivity Analysis of the Addition of Dapagliflozin to Standard of Care in Chronic HF.**

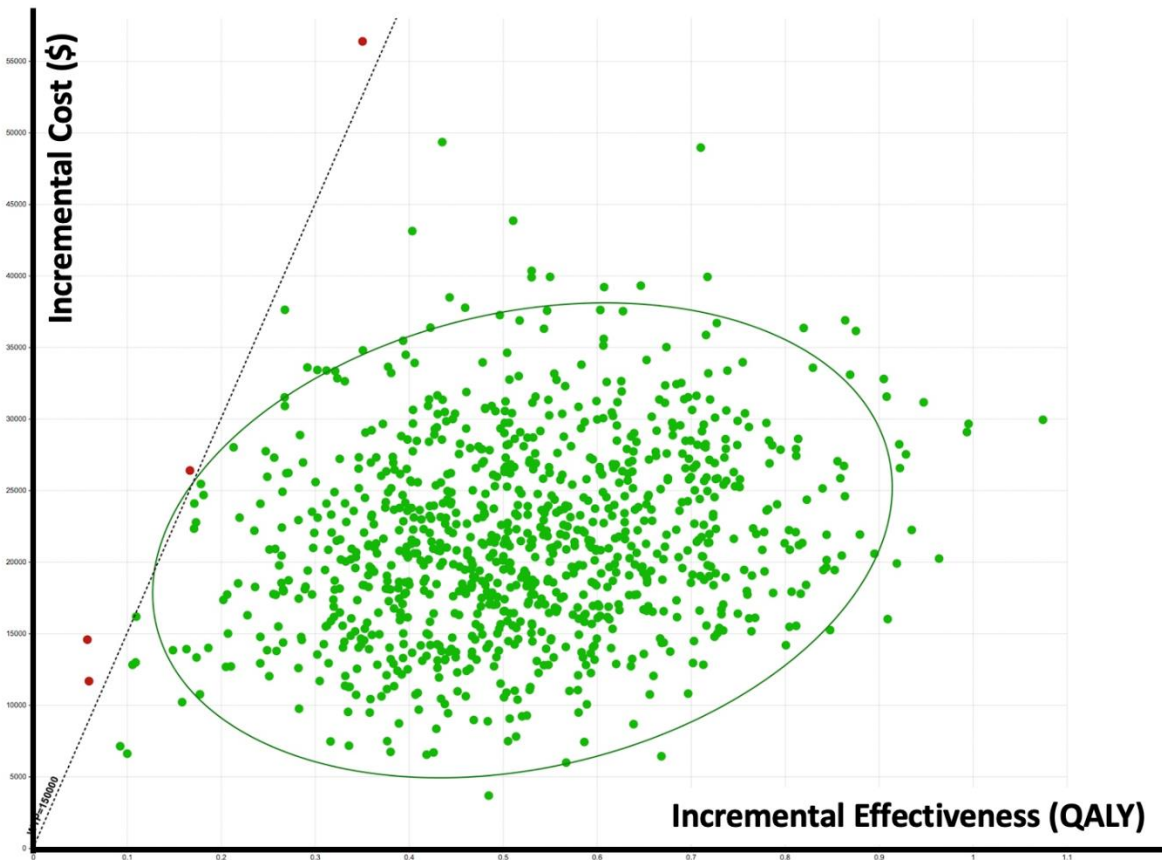

Model parameters were independently varied across their distributions in a probabilistic sensitivity analysis for 100,000 iterations using the discounted Medicare cost (\$262/mo), with each iteration displayed as a dot in this scatter plot. The dashed black line represents a willingness to pay threshold of \$150,000 per QALY gained. The green oval represents points falling in the 95% credible interval. Green dots represent iterations at an ICER <\$150,000 per QALY gained; red dots represent iterations at an ICER ≥\$150,000 per QALY gained.

WTP = willingness-to-pay

Figure S3. Cost-effectiveness Acceptability Curve based on Probabilistic Sensitivity Analysis.

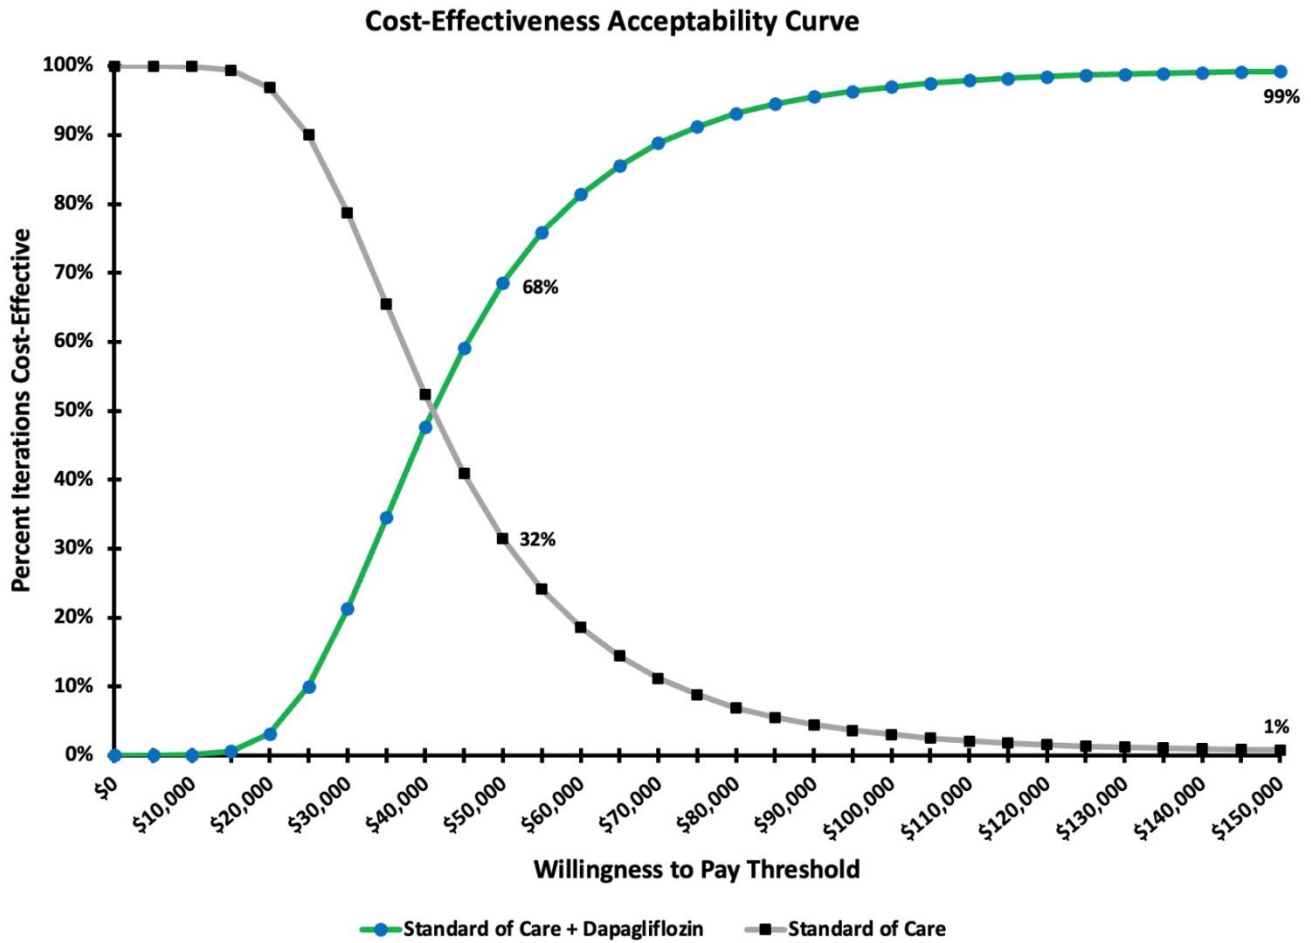

All model parameters were independently varied across their distributions in a probabilistic sensitivity analysis for 100,000 iterations using the discounted Medicare cost (\$262/mo). The percentage of iterations that were cost-effective is plotted across various willingness-to-pay thresholds.

## CHEERS 2022 Checklist

| Topic                                | No. | Item                                                                                                                            | Location where item is reported           |
|--------------------------------------|-----|---------------------------------------------------------------------------------------------------------------------------------|-------------------------------------------|
| <b>Title</b>                         |     |                                                                                                                                 |                                           |
|                                      | 1   | Identify the study as an economic evaluation and specify the interventions being compared.                                      | Title, Page 1                             |
| <b>Abstract</b>                      |     |                                                                                                                                 |                                           |
|                                      | 2   | Provide a structured summary that highlights context, key methods, results, and alternative analyses.                           | Abstract, Page 5                          |
| <b>Introduction</b>                  |     |                                                                                                                                 |                                           |
| <b>Background and objectives</b>     | 3   | Give the context for the study, the study question, and its practical relevance for decision making in policy or practice.      | Introduction, Paragraph 1-2               |
| <b>Methods</b>                       |     |                                                                                                                                 |                                           |
| <b>Health economic analysis plan</b> | 4   | Indicate whether a health economic analysis plan was developed and where available.                                             | Methods, Paragraph 1                      |
| <b>Study population</b>              | 5   | Describe characteristics of the study population (such as age range, demographics, socioeconomic, or clinical characteristics). | Methods, Paragraph 1                      |
| <b>Setting and location</b>          | 6   | Provide relevant contextual information that may influence findings.                                                            | Methods, Paragraph 1                      |
| <b>Comparators</b>                   | 7   | Describe the interventions or strategies being compared and why chosen.                                                         | Methods, Paragraph 1                      |
| <b>Perspective</b>                   | 8   | State the perspective(s) adopted by the study and why chosen.                                                                   | Methods, Paragraph 1                      |
| <b>Time horizon</b>                  | 9   | State the time horizon for the study and why appropriate.                                                                       | Statistical Analysis, Paragraph 1         |
| <b>Discount rate</b>                 | 10  | Report the discount rate(s) and reason chosen.                                                                                  | Statistical Analysis, Paragraph 1         |
| <b>Selection of outcomes</b>         | 11  | Describe what outcomes were used as the measure(s) of benefit(s) and harm(s).                                                   | Baseline assumptions and modeling inputs, |

| Topic                                                                        | No. | Item                                                                                                                                                                          | Location where item is reported           |
|------------------------------------------------------------------------------|-----|-------------------------------------------------------------------------------------------------------------------------------------------------------------------------------|-------------------------------------------|
| <b>Measurement of outcomes</b>                                               | 12  | Describe how outcomes used to capture benefit(s) and harm(s) were measured.                                                                                                   | Baseline assumptions and modeling inputs, |
| <b>Valuation of outcomes</b>                                                 | 13  | Describe the population and methods used to measure and value outcomes.                                                                                                       | Baseline assumptions and modeling inputs, |
| <b>Measurement and valuation of resources and costs</b>                      | 14  | Describe how costs were valued.                                                                                                                                               | Costs, Paragraph 1-2                      |
| <b>Currency, price date, and conversion</b>                                  | 15  | Report the dates of the estimated resource quantities and unit costs, plus the currency and year of conversion.                                                               | Costs, Paragraph 3                        |
| <b>Rationale and description of model</b>                                    | 16  | If modelling is used, describe in detail and why used. Report if the model is publicly available and where it can be accessed.                                                | Statistical Analysis, Paragraph 1         |
| <b>Analytics and assumptions</b>                                             | 17  | Describe any methods for analysing or statistically transforming data, any extrapolation methods, and approaches for validating any model used.                               | Baseline assumptions and modeling inputs  |
| <b>Characterising heterogeneity</b>                                          | 18  | Describe any methods used for estimating how the results of the study vary for subgroups.                                                                                     | Statistical Analysis, Paragraph 2         |
| <b>Characterising distributional effects</b>                                 | 19  | Describe how impacts are distributed across different individuals or adjustments made to reflect priority populations.                                                        | Baseline assumptions and modeling inputs  |
| <b>Characterising uncertainty</b>                                            | 20  | Describe methods to characterise any sources of uncertainty in the analysis.                                                                                                  | Not Statistical Analysis, Paragraph 2     |
| <b>Approach to engagement with patients and others affected by the study</b> | 21  | Describe any approaches to engage patients or service recipients, the general public, communities, or stakeholders (such as clinicians or payers) in the design of the study. | N/A                                       |
| <b>Results</b>                                                               |     |                                                                                                                                                                               |                                           |
| <b>Study parameters</b>                                                      | 22  | Report all analytic inputs (such as values, ranges, references) including uncertainty or distributional assumptions.                                                          | Results, Paragraph 1                      |



| Topic                                                                       | No. | Item                                                                                                                                                                     | Location where item is reported |
|-----------------------------------------------------------------------------|-----|--------------------------------------------------------------------------------------------------------------------------------------------------------------------------|---------------------------------|
| <b>Summary of main results</b>                                              | 23  | Report the mean values for the main categories of costs and outcomes of interest and summarise them in the most appropriate overall measure.                             | Results, Paragraph 2            |
| <b>Effect of uncertainty</b>                                                | 24  | Describe how uncertainty about analytic judgments, inputs, or projections affect findings. Report the effect of choice of discount rate and time horizon, if applicable. | Paragraph 3                     |
| <b>Effect of engagement with patients and others affected by the study</b>  | 25  | Report on any difference patient/service recipient, general public, community, or stakeholder involvement made to the approach or findings of the study                  | Not reported                    |
| <b>Discussion</b>                                                           |     |                                                                                                                                                                          |                                 |
| <b>Study findings, limitations, generalisability, and current knowledge</b> | 26  | Report key findings, limitations, ethical or equity considerations not captured, and how these could affect patients, policy, or practice.                               | Discussion                      |
| <b>Other relevant information</b>                                           |     |                                                                                                                                                                          |                                 |
| <b>Source of funding</b>                                                    | 27  | Describe how the study was funded and any role of the funder in the identification, design, conduct, and reporting of the analysis                                       | Disclosures, Page 3             |
| <b>Conflicts of interest</b>                                                | 28  | Report authors conflicts of interest according to journal or International Committee of Medical Journal Editors requirements.                                            | Disclosures, Page 2-3           |

From: Husereau D, Drummond M, Augustovski F, et al. Consolidated Health Economic Evaluation Reporting Standards 2022 (CHEERS 2022) Explanation and Elaboration: A Report of the ISPOR CHEERS II Good Practices Task Force. Value Health 2022;25.  
[doi:10.1016/j.jval.2021.10.008](https://doi.org/10.1016/j.jval.2021.10.008)
